# Supplementary material
Source: publisher site journal article supplement (http://e-cmh.org/upload/media/cmh-2023-0076-Supplementary-Fig-4.pdf)
Supplement: Supplementary file 1 [file cmh-2023-0076-Supplementary-Fig-4.pdf]

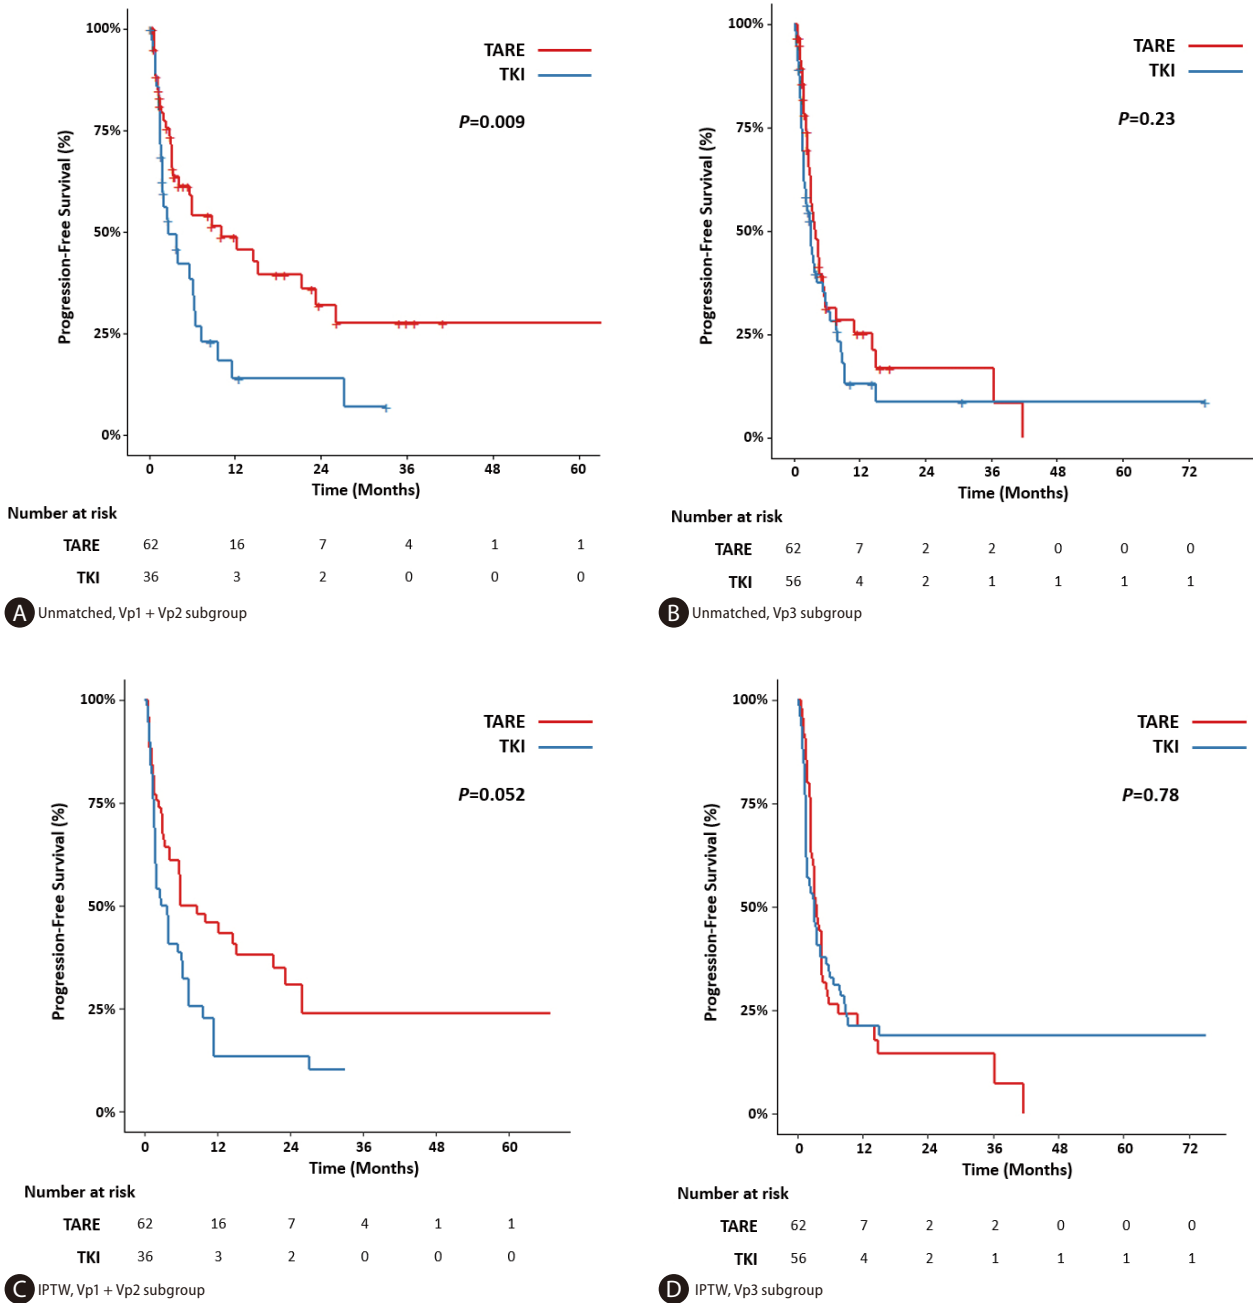

**Supplementary Figure 4.** Comparison of PFS in subgroup analyses according to the level of PVTT. PFS was compared between patients with Vp1 or Vp2 PVTT and those with Vp3 PVTT in an unmatched cohort (A, B) and a balanced cohort using IPTW (C, D). IPTW, inverse probability of treatment weighting; PFS, progression-free survival; PVTT, portal vein tumor thrombosis; TARE, transarterial radioembolization; TKI, tyrosine kinase inhibitor.
